# Supplementary material for: Trypanosoma cruzi Genomic Variability: Array Comparative Genomic Hybridization Analysis of Clone and Parental Strain
Source: Front Cell Infect Microbiol. 2022 Mar 25;12:760830. doi: 10.3389/fcimb.2022.760830 (PMC8992781; doi:10.3389/fcimb.2022.760830)
Supplement: Supplementary file 14 [file Table_4.xlsx]

## Sheet: Plan1
		Table S4.	Primers of genes used in quantitative real-time PCR analysis
		TcChr	Genes			Primer Sequence
			Gene ID	Start	End	Forward (5'->3')	Reverse (5'->3')
		6	Tc00.1047053509429.250	302856	306257	TGAGCCGCGCCCTAAAA	TGCCCGCCGGTTTTCAA
		8	Tc00.1047053510337.30	146763	148151	TTCCGCCAAACTGCCCAT	TCACGGTGCACAAGCAGT
		12	Tc00.1047053503631.9	123806	125734	AGTGGGCACGCAGCAAA	GCTCCTCGGAACTCAGGACT
		12	Tc00.1047053509573.40	439833	440546	GCTCCCGTGCGTACATGAT	TTCGCCGCACTGACACAA
		13	Tc00.1047053511815.90	200717	202384	ACCGCAAACGGCTCGAT	CCCCTCTTCCATCCCTGTTC
		13	Tc00.1047053511827.50	465082	466506	GCTGGCTCGACTGGAGATCT	GCGTAAGAACGGCGTCGA
		22	Tc00.1047053509499.20	118952	120400	CGGGTTCCAGTTGCACAG	CGGCCGTCCCAGTATTGT
		22	Tc00.1047053504427.170	310344	311150	CGCGGCGGGAAGTATTAC	CTGCTGCTGACGCCCTAGTA
		24	Tc00.1047053509123.30	248254	248985	CGGTAGAGACCCTCCACCTT	TTGCTGCGCCTGTTCGT
